# Supplementary material
Source: Springer Nature journal article supplement (https://www.springermedizin.de/resource/supplementary/12913_2009_1283_MOESM4_ESM.pdf/9527766)
Supplement: MOESM4 [file 9527766]

- 1 - Place of study/ Year of publication
- 2 - Design
- 3 - Study level / Period / Year of data collection
- 4 - Main goal of the study
- 5 - Keywords: in addition to the initial keywords, the terms mentioned in the retrieved studies were also used. For papers without keywords (3 papers) keywords used were the same of the original search
- 6 - Instrument: developed by the authors or by international organizations
- 7 - Studied sample (not necessarily the whole sample of the study)
- 8 – Recruitment strategies to evaluate access (beyond the inclusion criteria to participate in the study, one or more filter questions to evaluate medicine access are placed to restrict the population that will be analyzed for this particular topic, distinguishing it from the study sample)
- 9 - Evaluated medicine: all, for acute problems, for chronic conditions
- 10 - Access definition / Recall period
- 11 - Question used to measure access
- 12 - Administration of the instrument: face-to-face interviews, telephone, internet
- 13 - Dropout and Response rates
- 14 – Respondent: medicine user, user and parents, user and proxy or user and caregiver
- 15 - Asking for the prescription, packet or leaflet
- 16 - Data collection of the medicine name (if the study collected information about the obtained medicines without specifying the name, or if investigated the name of the medicines)
